# Supplementary material for: Low-temperature synthesis of NH3via an alternate gas-switching NOx storage-reduction process using a BaO/Pt@mTiO2 nanocomposite catalyst
Source: Royal Society of Chemistry journal article supplement (doi:10.1039/d3ta07052b), 2024-01-01
Supplement: d3ta07052b1.pdf [file d3ta07052b1.pdf]

## Supporting Information

### Low-temperature synthesis of $\text{NH}_3$ via an alternate gas-switching $\text{NO}_x$ storage-reduction process using a $\text{BaO/Pt@mTiO}_2$ nanocomposite catalyst

Yuxiao Zhang, Atsuko Tomita, Ryutaro Wakabayashi and Tatsuo Kimura\*

National Institute of Advanced Industrial Science and Technology (AIST), Sakurazaka, Moriyama-ku, Nagoya 463-8560, Japan.

\*t-kimura@aist.go.jp

**Table S1** The amount of stored  $\text{NO}_x$  and resultant nitrogen compounds during the 1st gas-switching operation of the inlet gas between 1000 ppm NO with 10%  $\text{O}_2$  and 1%  $\text{H}_2$  at temperatures ranging from 300 °C down to 175 °C

| temp. (°C) | Storage ( $\text{mmol g}^{-1}$ )          | Reduction ( $\text{mmol g}^{-1}$ ) |                      |              |
|------------|-------------------------------------------|------------------------------------|----------------------|--------------|
|            | $\text{NO}_x$ ( $\text{NO}+\text{NO}_2$ ) | $\text{NH}_3$                      | $\text{N}_2\text{O}$ | $\text{N}_2$ |
| 175        | 0.15                                      | 0.14                               | 0.00                 | 0.01         |
| 200        | 0.21                                      | 0.15                               | 0.01                 | 0.02         |
| 250        | 0.26                                      | 0.16                               | 0.01                 | 0.04         |
| 300        | 0.18                                      | 0.03                               | 0.01                 | 0.06         |

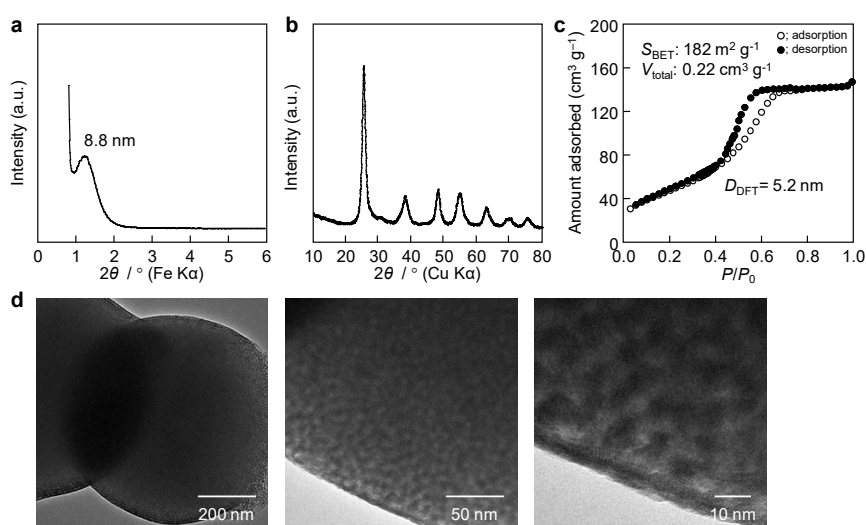

**Fig. S1** Low- and wide-angle XRD patterns,  $\text{N}_2$  adsorption-desorption isotherm and TEM images of (a, b, c, d)  $\text{mTiO}_2$  prepared through an aerosol-assisted EISA process in the presence of Pluronic F127.

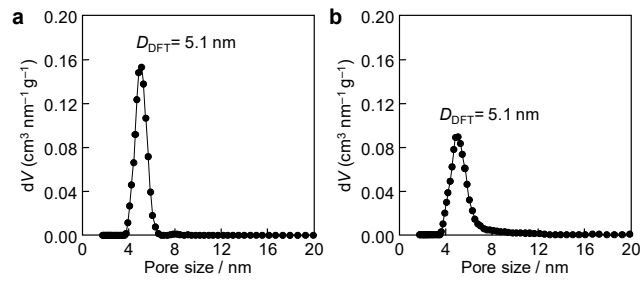

**Fig. S2** Pore size distribution curves of (a) Pt@mTiO<sub>2</sub> and (b) BaO/Pt@mTiO<sub>2</sub>.

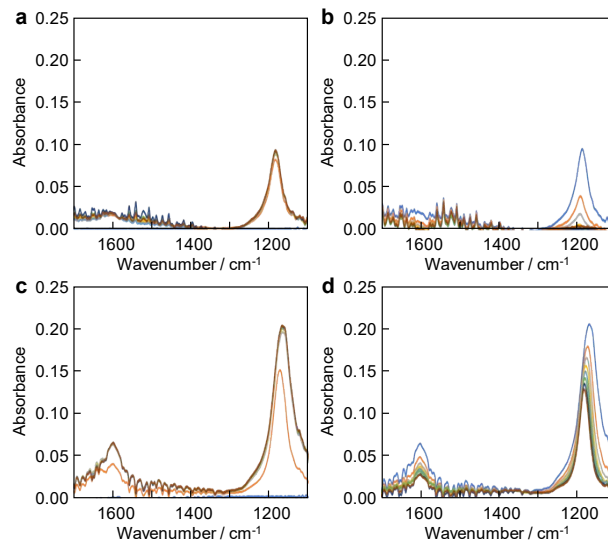

**Fig. S3** *In situ* FT-IR measurements at every 4 min by using BaO/Pt@mTiO<sub>2</sub> during the gas-switching operation of the inlet gas between 500 ppm NH<sub>3</sub> for 30 min and N<sub>2</sub> for 30 min at (a, b) 300 °C and (c, d) 175 °C.

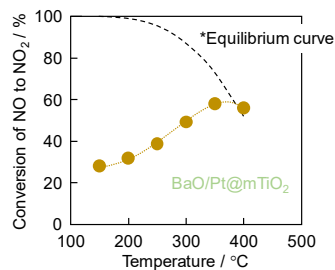

**Fig. S4** The steady-state oxidation of NO in a flow of 1000 ppm NO with 10% O<sub>2</sub> for 30 min by using BaO/Pt@mTiO<sub>2</sub> at different temperatures.

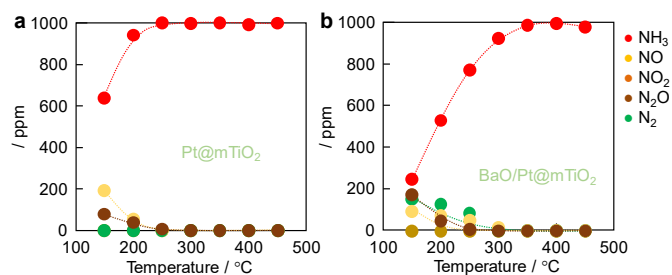

**Fig. S5** Direct catalytic reduction of NO in a flow of 1000 ppm NO with 1% H<sub>2</sub> by using (a) Pt@mTiO<sub>2</sub> and (b) BaO/Pt@mTiO<sub>2</sub> at different temperatures.

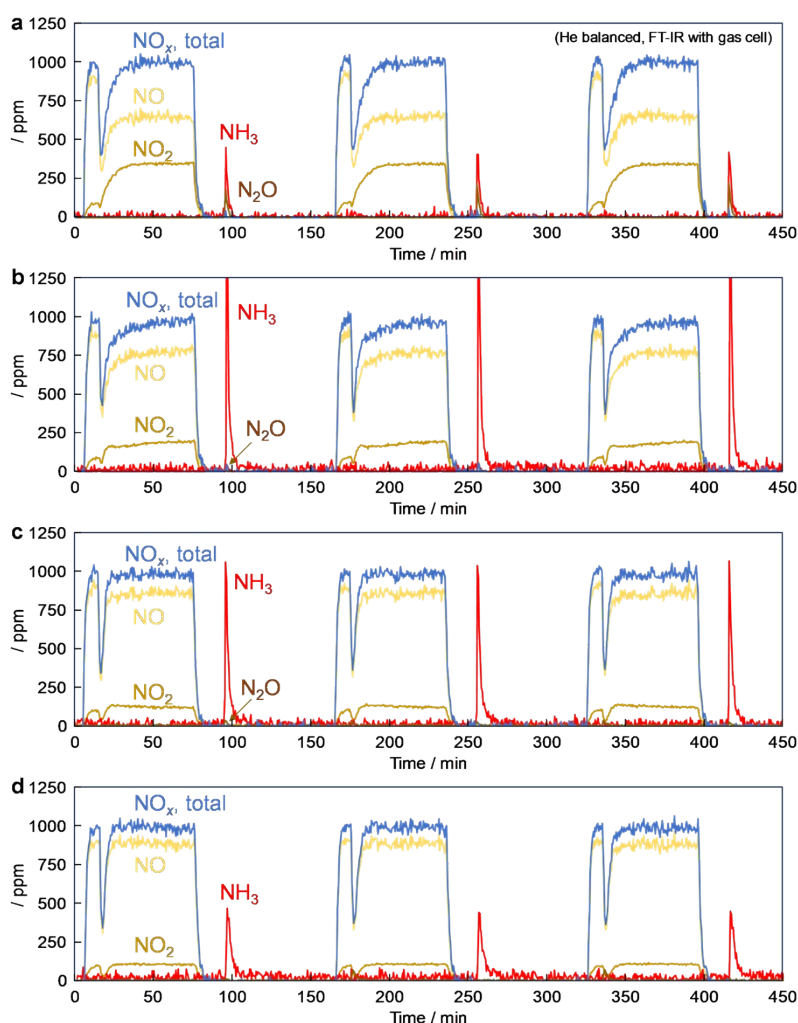

**Fig. S6** Time-course plots of nitrogen compounds (e.g., NO, NO<sub>2</sub>, N<sub>2</sub>O and NH<sub>3</sub>) during the alternate gas-switching operation of the inlet gas between 1000 ppm NO with 10% O<sub>2</sub> and 5% H<sub>2</sub> at (a) 300 °C, (b) 250 °C (c) 200 °C and down to (d) 175 °C.

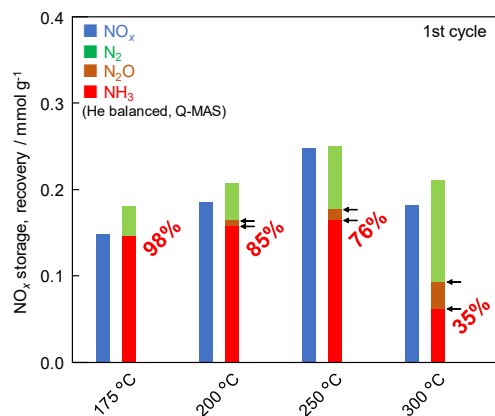

**Fig. S7** A summary of the amount of stored NO<sub>x</sub> and resultant nitrogen compounds with the selectivity to NH<sub>3</sub> during the 1st gas-switching operation of the inlet gas between 1000 ppm NO with 10% O<sub>2</sub> and 5% H<sub>2</sub> at temperatures ranging from 300 °C down to 175 °C.
